# Supplementary material for: Genome-Wide Association Studies in Diverse Spring Wheat Panel for Stripe, Stem, and Leaf Rust Resistance
Source: Front Plant Sci. 2020 Jun 3;11:748. doi: 10.3389/fpls.2020.00748 (PMC7286347; doi:10.3389/fpls.2020.00748)
Supplement: TABLE S4 — Basic statistics of disease response on RAMP at seedling and adult plant stages. [file Table_4.XLSX]

## Sheet: Sheet1
Supplementary Table S4: Basic statistics of disease response on RAMP at seedling and adult plant stages
Summary statistics of disease response at seedling stage
Pathotypes		YR_110S119	YR_T	YR_238S119	YR_46S119	YR_110S84	LR_106	LR_77-5	LR_104-2	LR_77-9	LR_12-5	LR_77-1	SR_40A	SR_21A2	SR_11	SR_34-1	SR_40-3	SR_117-6	SR_122
No.of observation	Valid	483	469	468	472	483	477	483	483	458	465	450	482	454	472	470	447	483	474
	Missing	0	14	15	11	0	6	0	0	25	18	33	1	29	11	13	36	0	9
Mean		7.56315	5.11887	5.64156	3.51589	5.26035	1.87195	6.67509	6.10035	6.80352	5.00415	4.43093	5.29876	2.45154	4.20551	1.61702	2.72092	3.07867	2.62342
Median		8	7	8	3.5	8	0	8	8	8	5	5	5	0.5	4	0	0	1	0.5
Mode		8	8	8	0	8	0	8	8	8	8	5	8	0	8	0	0	0	0.5
Std. Deviation		1.59572	3.34978	3.26504	3.4989	3.43375	3.00255	2.38929	2.73651	2.40467	2.85568	3.07773	2.59777	2.77204	3.1757	2.79852	3.16936	3.21853	2.92779
Variance		2.54632	11.221	10.6605	12.2423	11.7906	9.01529	5.70872	7.48851	5.78246	8.15489	9.47244	6.7484	7.68418	10.0851	7.83169	10.0448	10.3589	8.57195
Skewness		-3.88853	-0.623366	-0.88947	0.188082	-0.697821	1.32157	-1.65007	-1.06047	-1.91979	-0.545368	-0.219786	-0.723638	0.640756	-0.1019	1.46631	0.532493	0.499718	0.732424
Std. Error of Skewness		0.111112	0.112747	0.112867	0.112391	0.111112	0.111804	0.111112	0.111112	0.114085	0.113228	0.115088	0.111226	0.114583	0.112391	0.112628	0.115471	0.111112	0.112155
Range		8	8	8	8	8	8	8	8	8	8	8	8	8	8	8	8	8	8
Minimum		0	0	0	0	0	0	0	0	0	0	0	0	0	0	0	0	0	0
Maximum		8	8	8	8	8	8	8	8	8	8	8	8	8	8	8	8	8	8
Summary statistics of disease response at adult plant stage
Environments		COI_YR_E1	COI_YR_E2	COI_YR_E3	COI_YR_E4	COI_LR_E1	COI_LR_E2	COI_LR_E3	COI_LR_E4	COI_SR_E1	COI_SR_E2	COI_SR_E3	COI_SR_E4
No.of observation	Valid	483	483	482	482	483	464	475	483	480	481	475	482
	Missing	0	0	1	1	0	19	8	0	3	2	8	1
Mean		38.3168	31.1325	44.6452	30.2407	19.1201	21.472	17.2274	16.2567	24.0646	20.8087	26.9979	20.9979
Median		32	24	48	24	10	20	10	10	16	16	32	16
Mode		100	48	80	24	0	20	0	.0a	40	40	40	40
Std. Deviation		32.1063	28.8504	32.6952	27.2615	26.9576	22.3585	21.5317	17.8665	21.3177	16.9842	19.7478	17.4821
Variance		1030.81	832.348	1068.97	743.189	726.712	499.904	463.615	319.212	454.445	288.463	389.977	305.624
Skewness		0.574288	0.769404	0.261283	0.884704	1.7323	1.58706	1.81313	1.4665	1.14193	0.747074	0.3495	0.659077
Std. Error of Skewness		0.111112	0.111112	0.111226	0.111226	0.111112	0.113349	0.112038	0.111112	0.111456	0.111341	0.112038	0.111226
Range		100	100	100	100	100	100	100	100	100	80	80	60
Minimum		0	0	0	0	0	0	0	0	0	0	0	0
Maximum		100	100	100	100	100	100	100	100	100	80	80	60
a. Multiple modes exist. The smallest value is shown
